# Supplementary material for: Regulatory delays in a multinational clinical stroke trial
Source: PubMed Central journal article supplement (PMC8370076; doi:10.1177/23969873211004845), 2021-03-30
Supplement: sj-pdf-1-eso-10.1177_23969873211004845.pdf [file sj-pdf-1-eso-10.1177_23969873211004845.pdf]

**Supplementary Table 1 – Time to first included patient**

| <b>Country</b> | <b>REC</b>             |                     |
|----------------|------------------------|---------------------|
|                | <b>Number of sites</b> | <b>Median [IQR]</b> |
| Estonia        | 4/4                    | 573 [251-692]       |
| Germany        | 6/8                    | 63 [14-148]         |
| Greece         | 5/5                    | 66 [29-132]         |
| Hungary        | 7/13                   | 72 [7-204]          |
| Italy          | 9/11                   | 89 [30-216]         |
| Netherlands    | 11/14                  | 71 [26-162]         |
| Norway         | 2/4                    | 271                 |
| Poland         | 5/6                    | 88 [19-172]         |
| United Kingdom | 18/20                  | 47 [24-108]         |
| Total          | 67/85                  | 83 [33-154]         |

Median number of days from trial site initiation to the first included patient for each country  
**Abbreviations:** IQR, interquartile range.
